# Supplementary figures and images for: Cross-sectional and longitudinal measures of chitinase proteins in amyotrophic lateral sclerosis and expression of CHI3L1 in activated astrocytes
Source: HighWire-hosted journal article supplement (doi:10.1136/jnnp-2019-321916), 2020-01-14

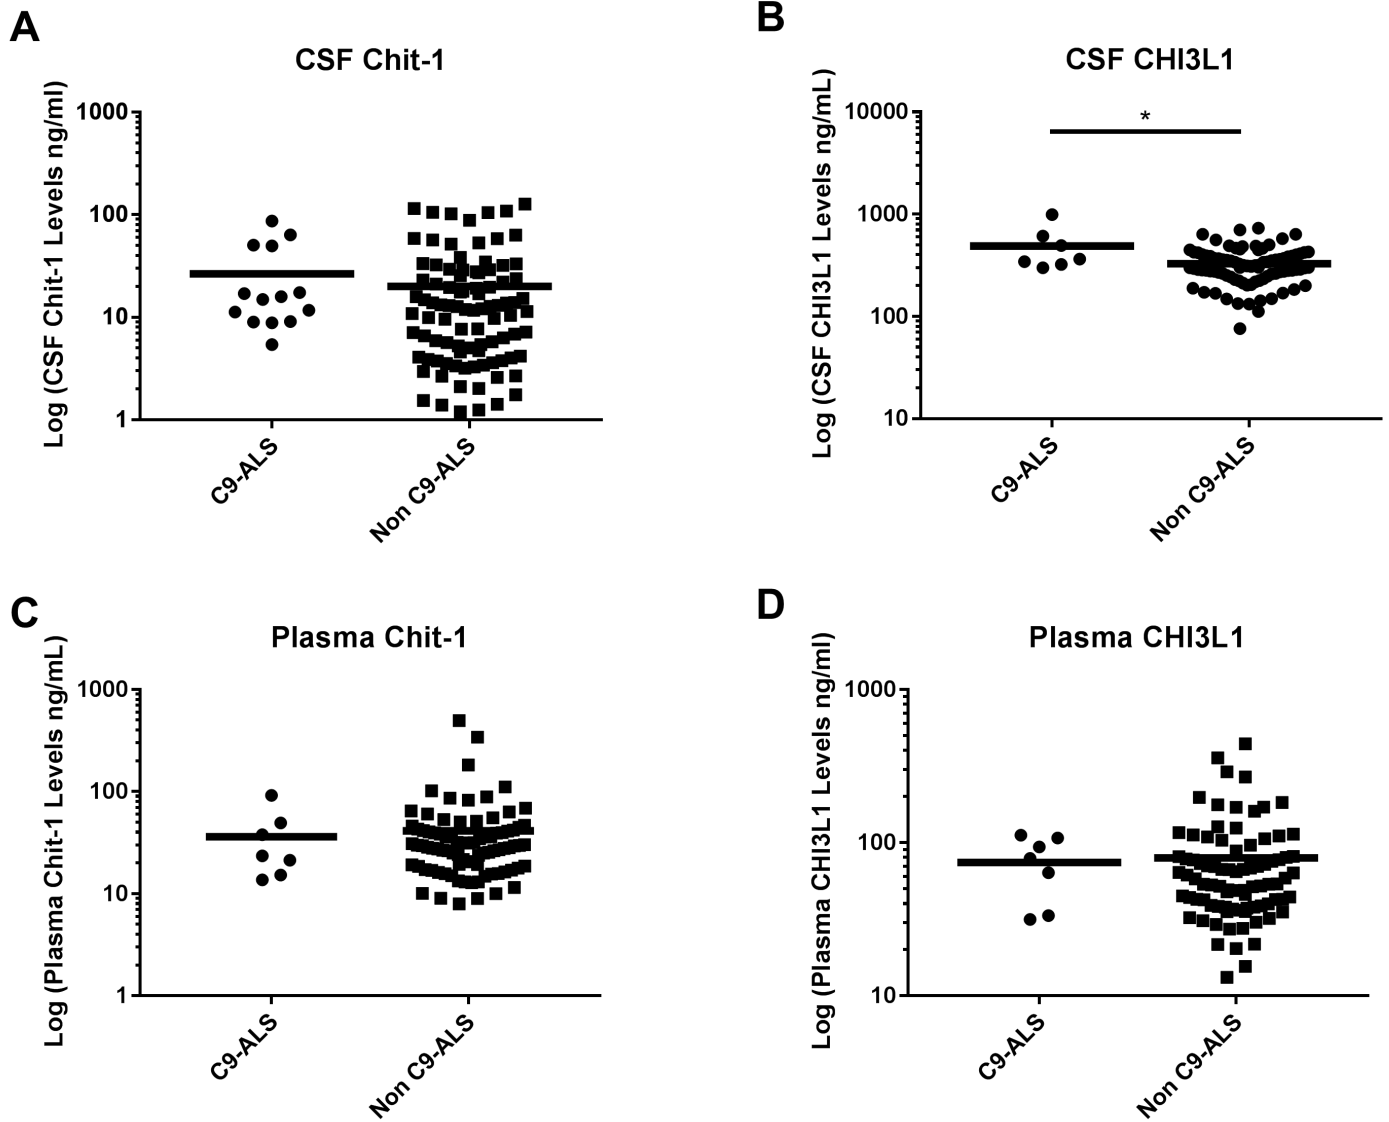

Supplement: jnnp-2019-321916supp002_data_supplement.pdf [file jnnp-2019-321916supp002_data_supplement.pdf]

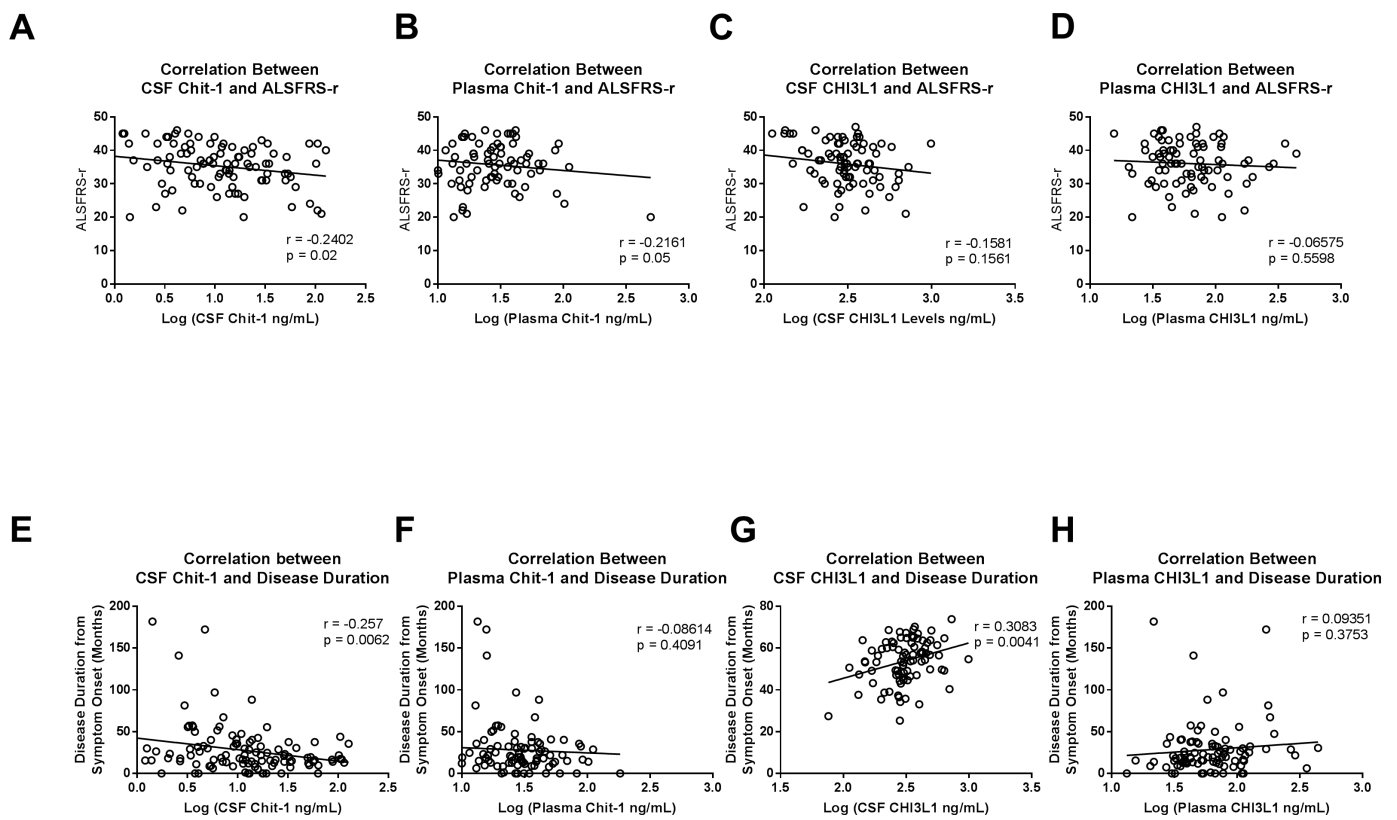

Supplement: jnnp-2019-321916supp003_data_supplement.pdf [file jnnp-2019-321916supp003_data_supplement.pdf]

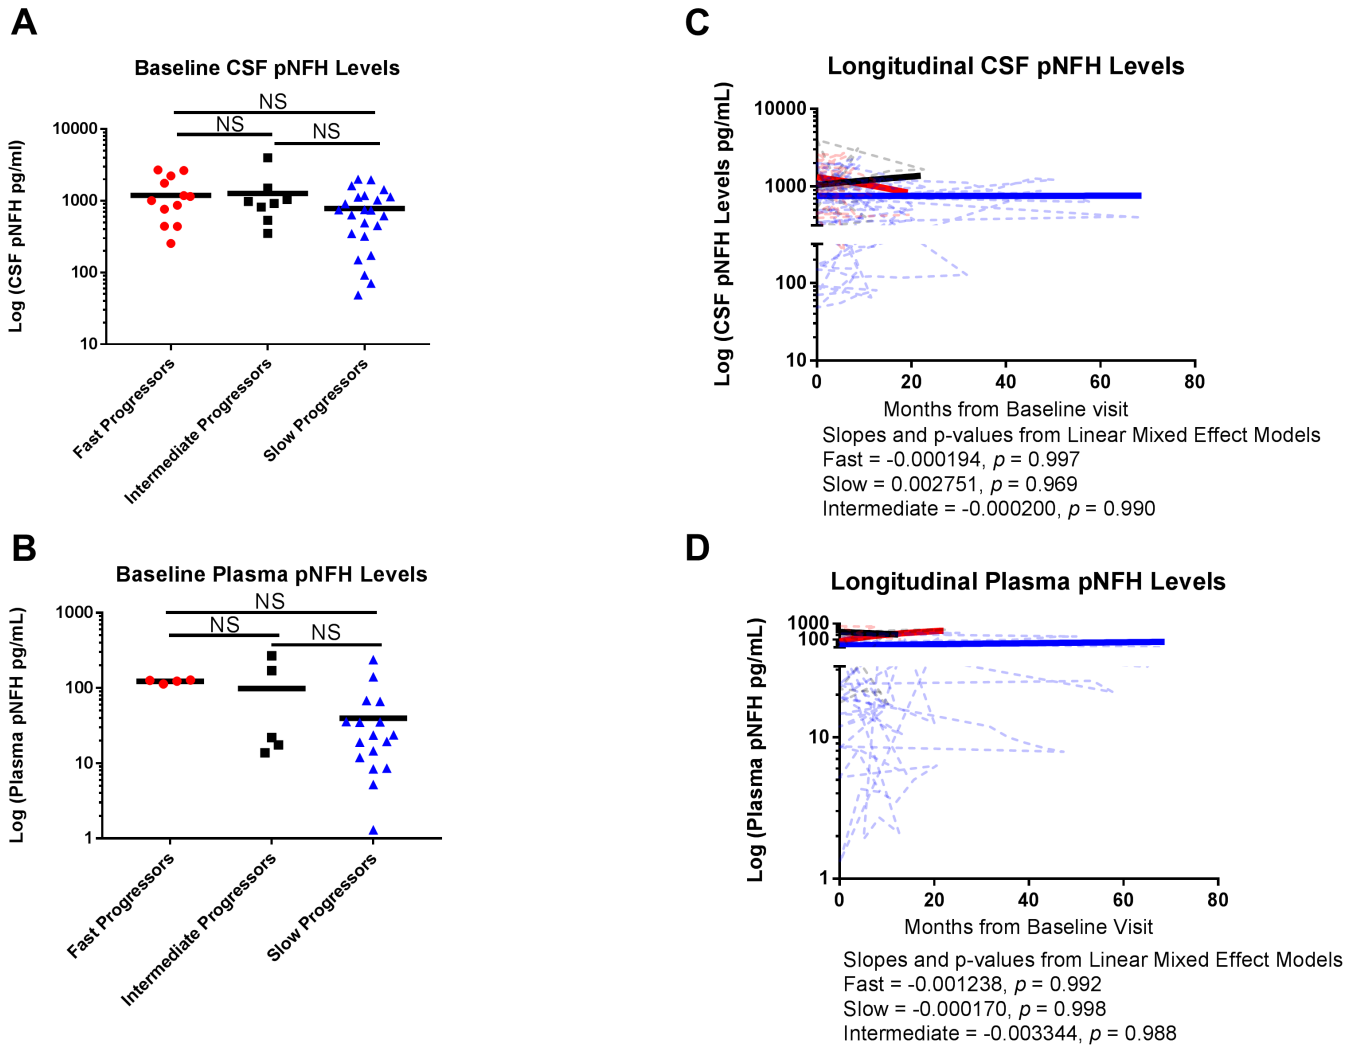

Supplement: jnnp-2019-321916supp004_data_supplement.pdf [file jnnp-2019-321916supp004_data_supplement.pdf]

**A**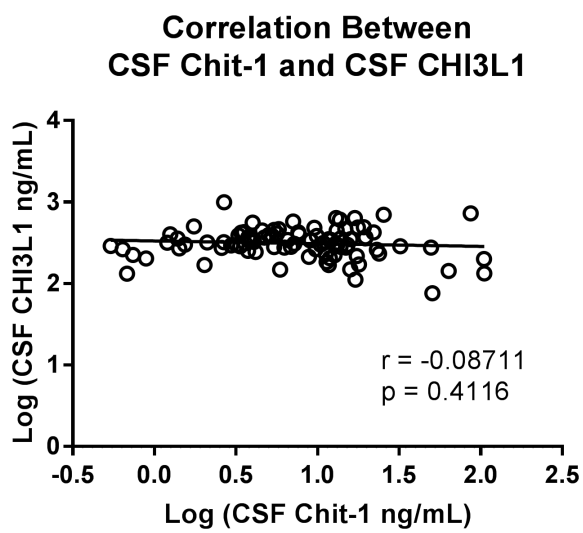**B**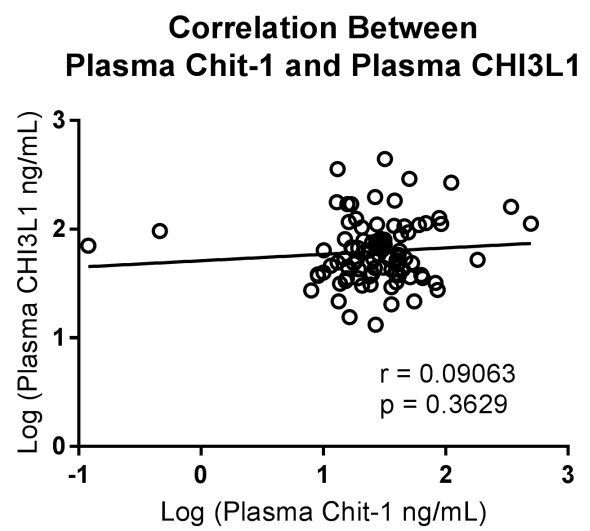

Supplement: jnnp-2019-321916supp005_data_supplement.pdf [file jnnp-2019-321916supp005_data_supplement.pdf]
